# Supplementary material
Source: HighWire-hosted journal article supplement (https://erj.ersjournals.com/content/61/1/2200002)
Supplement: inline-supplementary-material-1 [file inline-supplementary-material-1.pdf]

## Supplementary materials

**Table S1:** Significant relative abundance taxa in in gut microbiome composition in naïve mice subjected to FMT from mice exposed to RA and IH and treated with VSL3

| Taxon                                                                                                                                                      | Relative Abundance (Mean $\pm$ SD) |                    |                   |                    | ANCOM   | ALDEx2   |          |
|------------------------------------------------------------------------------------------------------------------------------------------------------------|------------------------------------|--------------------|-------------------|--------------------|---------|----------|----------|
|                                                                                                                                                            | RA FMT                             | RA FMT PRO         | IH FMT            | IH FMT PRO         | W score | glm.ep   | glm.eBH  |
| d__Bacteria; p__Firmicutes; c__Bacilli;<br>o__Erysipelotrichales; f__Erysipelotrichaceae;<br>g__Dubosiella; s__uncultured_bacterium                        | 3.75% $\pm$ 1.23%                  | 0.44% $\pm$ 0.27%  | 1.77% $\pm$ 0.89% | 15.05% $\pm$ 5.65% |         | 6.96E-09 | 4.05E-06 |
| d__Bacteria; p__Bacteroidota; c__Bacteroidia;<br>o__Bacteroidales; f__Muribaculaceae;<br>g__Muribaculaceae; s__uncultured_Bacteroidales                    | 0.59% $\pm$ 0.17%                  | 0.91% $\pm$ 0.26%  | 0.69% $\pm$ 0.05% | 0.32% $\pm$ 0.02%  |         | 8.86E-08 | 2.11E-05 |
| d__Bacteria; p__Bacteroidota; c__Bacteroidia;<br>o__Bacteroidales; f__Muribaculaceae;<br>g__Muribaculaceae; s__uncultured_bacterium                        | 0.08% $\pm$ 0.03%                  | 0.15% $\pm$ 0.04%  | 0.41% $\pm$ 0.04% | 0.26% $\pm$ 0.07%  |         | 8.94E-08 | 2.24E-05 |
| d__Bacteria; p__Bacteroidota; c__Bacteroidia;<br>o__Bacteroidales; f__Muribaculaceae;<br>g__Muribaculaceae; s__uncultured_Bacteroidales                    | 0.72% $\pm$ 0.29%                  | 0.19% $\pm$ 0.05%  | 0.07% $\pm$ 0.04% | 0.16% $\pm$ 0.07%  |         | 5.72E-07 | 1.13E-04 |
| d__Bacteria; p__Bacteroidota; c__Bacteroidia;<br>o__Bacteroidales; f__Muribaculaceae;<br>g__Muribaculaceae; s__uncultured_bacterium                        | 0.41% $\pm$ 0.16%                  | 0.33% $\pm$ 0.02%  | 0.00% $\pm$ 0.00% | 0.00% $\pm$ 0.00%  | 1700    | 1.25E-06 | 1.67E-04 |
| d__Bacteria; p__Firmicutes; c__Bacilli;<br>o__Lactobacillales; f__Streptococcaceae;<br>g__Lactococcus; s__Lactococcus_lactis                               | 0.00% $\pm$ 0.00%                  | 0.11% $\pm$ 0.10%  | 0.00% $\pm$ 0.00% | 0.26% $\pm$ 0.30%  | 1591    | 7.52E-06 | 5.09E-04 |
| d__Bacteria; p__Proteobacteria;<br>c__Gammaproteobacteria; o__Burkholderiales;<br>f__Sutterellaceae; g__Parasutterella;<br>s__uncultured_organism          | 0.25% $\pm$ 0.13%                  | 1.00% $\pm$ 0.17%  | 0.11% $\pm$ 0.10% | 0.16% $\pm$ 0.04%  |         | 4.14E-06 | 5.30E-04 |
| d__Bacteria; p__Bacteroidota; c__Bacteroidia;<br>o__Bacteroidales; f__Muribaculaceae;<br>g__Muribaculaceae; s__uncultured_organism                         | 0.67% $\pm$ 0.36%                  | 0.01% $\pm$ 0.01%  | 0.26% $\pm$ 0.09% | 0.17% $\pm$ 0.09%  | 1623    | 7.93E-06 | 6.13E-04 |
| d__Bacteria; p__Bacteroidota; c__Bacteroidia;<br>o__Bacteroidales; f__Muribaculaceae;<br>g__Muribaculaceae; s__uncultured_bacterium                        | 19.29% $\pm$ 4.36%                 | 17.86% $\pm$ 4.95% | 8.05% $\pm$ 1.08% | 6.76% $\pm$ 3.20%  |         | 4.97E-06 | 6.58E-04 |
| d__Bacteria; p__Actinobacteriota;<br>c__Actinobacteria; o__Bifidobacteriales;<br>f__Bifidobacteriaceae; g__Bifidobacterium;<br>s__Bifidobacterium_animalis | 0.00% $\pm$ 0.00%                  | 0.13% $\pm$ 0.06%  | 0.00% $\pm$ 0.00% | 0.15% $\pm$ 0.09%  | 1631    | 2.05E-05 | 1.09E-03 |
| d__Bacteria; p__Bacteroidota; c__Bacteroidia;<br>o__Bacteroidales; f__Muribaculaceae;<br>g__Muribaculaceae; s__uncultured_bacterium                        | 0.35% $\pm$ 0.11%                  | 0.30% $\pm$ 0.05%  | 0.11% $\pm$ 0.03% | 0.36% $\pm$ 0.13%  |         | 2.28E-05 | 1.83E-03 |
| d__Bacteria; p__Firmicutes; c__Bacilli;                                                                                                                    | 0.65% $\pm$                        | 0.04% $\pm$        | 0.16% $\pm$       | 2.40% $\pm$        |         | 5.17E-05 | 2.93E-03 |

|                                                                                                                                                           |                  |                  |                   |                  |      |          |          |
|-----------------------------------------------------------------------------------------------------------------------------------------------------------|------------------|------------------|-------------------|------------------|------|----------|----------|
| o__Erysipelotrichales; f__Erysipelotrichaceae;<br>g__Dubosiella; s__uncultured_bacterium                                                                  | 0.22%            | 0.06%            | 0.08%             | 0.89%            |      |          |          |
| d__Bacteria; p__Bacteroidota; c__Bacteroidia;<br>o__Bacteroidales; f__Muribaculaceae;<br>g__Muribaculaceae; s__uncultured_bacterium                       | 0.42% ±<br>0.13% | 0.12% ±<br>0.02% | 0.30% ±<br>0.10%  | 0.41% ±<br>0.21% |      | 5.08E-05 | 3.52E-03 |
| d__Bacteria; p__Bacteroidota; c__Bacteroidia;<br>o__Bacteroidales; f__Rikenellaceae; g__Alistipes;<br>s__uncultured_bacterium                             | 0.24% ±<br>0.14% | 0.66% ±<br>0.19% | 0.19% ±<br>0.09%  | 0.55% ±<br>0.10% |      | 6.14E-05 | 4.14E-03 |
| d__Bacteria; p__Firmicutes; c__Bacilli;<br>o__Lactobacillales; f__Lactobacillaceae;<br>g__Lactobacillus                                                   | 5.89% ±<br>2.04% | 1.99% ±<br>0.41% | 10.49%<br>± 8.26% | 2.20% ±<br>0.45% |      | 6.79E-05 | 4.72E-03 |
| d__Bacteria; p__Actinobacteriota;<br>c__Coriobacteriia; o__Coriobacteriales;<br>f__Atopobiaceae; g__Coriobacteriaceae_UCG-002;<br>s__uncultured_bacterium | 0.13% ±<br>0.09% | 0.21% ±<br>0.15% | 0.07% ±<br>0.02%  | 0.69% ±<br>0.31% |      | 1.22E-04 | 6.89E-03 |
| d__Bacteria; p__Bacteroidota; c__Bacteroidia;<br>o__Bacteroidales; f__Muribaculaceae;<br>g__Muribaculaceae; s__uncultured_Bacteroidales                   | 0.45% ±<br>0.27% | 0.83% ±<br>0.22% | 0.05% ±<br>0.05%  | 1.92% ±<br>0.89% |      | 2.62E-04 | 9.45E-03 |
| d__Bacteria; p__Actinobacteriota;<br>c__Coriobacteriia; o__Coriobacteriales;<br>f__Eggerthellaceae; g__Enterorhabdus                                      | 0.10% ±<br>0.05% | 0.05% ±<br>0.02% | 0.17% ±<br>0.04%  | 0.19% ±<br>0.02% |      | 2.33E-04 | 9.79E-03 |
| d__Bacteria; p__Proteobacteria;<br>c__Alphaproteobacteria; o__Rhodospirillales;<br>f__uncultured; g__uncultured;<br>s__Azospirillum_sp.                   | 0.00% ±<br>0.00% | 0.00% ±<br>0.00% | 0.00% ±<br>0.00%  | 0.11% ±<br>0.05% | 1577 | 5.48E-04 | 1.21E-02 |
| d__Bacteria; p__Firmicutes; c__Clostridia;<br>o__Lachnospirales; f__Lachnospiraceae;<br>g__Lachnospiraceae_NK4A136_group                                  | 0.00% ±<br>0.00% | 0.00% ±<br>0.00% | 0.13% ±<br>0.12%  | 0.00% ±<br>0.00% | 1557 | 5.36E-04 | 1.27E-02 |
| d__Bacteria; p__Proteobacteria;<br>c__Gammaproteobacteria; o__Burkholderiales;<br>f__Sutterellaceae; g__Parasutterella;<br>s__uncultured_bacterium        | 0.70% ±<br>0.22% | 0.43% ±<br>0.09% | 0.97% ±<br>0.18%  | 1.15% ±<br>0.22% |      | 3.64E-04 | 1.47E-02 |
| d__Bacteria; p__Firmicutes; c__Bacilli; o__RF39;<br>f__RF39; g__RF39                                                                                      | 0.01% ±<br>0.00% | 0.00% ±<br>0.00% | 0.02% ±<br>0.01%  | 0.05% ±<br>0.05% |      | 7.27E-04 | 1.51E-02 |
| d__Bacteria; p__Firmicutes; c__Clostridia;<br>o__Clostridia_UCG-014; f__Clostridia_UCG-014;<br>g__Clostridia_UCG-014                                      | 0.00% ±<br>0.01% | 0.01% ±<br>0.02% | 0.17% ±<br>0.08%  | 0.03% ±<br>0.02% |      | 5.52E-04 | 1.60E-02 |
| d__Bacteria; p__Firmicutes; c__Clostridia;<br>o__Clostridia_UCG-014; f__Clostridia_UCG-014;<br>g__Clostridia_UCG-014                                      | 0.01% ±<br>0.02% | 0.19% ±<br>0.13% | 0.18% ±<br>0.07%  | 0.02% ±<br>0.03% |      | 6.09E-04 | 1.67E-02 |
| d__Bacteria; p__Bacteroidota; c__Bacteroidia;<br>o__Bacteroidales; f__Muribaculaceae;<br>g__Muribaculaceae; s__uncultured_bacterium                       | 0.21% ±<br>0.13% | 0.08% ±<br>0.02% | 0.08% ±<br>0.02%  | 0.03% ±<br>0.02% |      | 5.29E-04 | 1.73E-02 |
| d__Bacteria; p__Bacteroidota; c__Bacteroidia;<br>o__Bacteroidales; f__Muribaculaceae;<br>g__Muribaculaceae; s__uncultured_bacterium                       | 1.20% ±<br>0.28% | 2.24% ±<br>0.93% | 2.72% ±<br>0.96%  | 3.39% ±<br>0.56% |      | 5.48E-04 | 1.98E-02 |
| d__Bacteria; p__Firmicutes; c__Clostridia;                                                                                                                | 0.00% ±          | 0.01% ±          | 0.04% ±           | 0.03% ±          |      | 1.28E-03 | 2.05E-02 |

|                                                                                                                                                                                        |                   |                    |                   |                   |  |          |          |
|----------------------------------------------------------------------------------------------------------------------------------------------------------------------------------------|-------------------|--------------------|-------------------|-------------------|--|----------|----------|
| o__Clostridiales; f__Clostridiaceae;<br>g__Clostridium_sensu_stricto_1                                                                                                                 | 0.00%             | 0.01%              | 0.01%             | 0.01%             |  |          |          |
| d__Bacteria; p__Firmicutes; c__Clostridia;<br>o__Oscillospirales; f__Oscillospiraceae;<br>g__uncultured; s__uncultured_Clostridiales                                                   | 0.19% ±<br>0.10%  | 0.24% ±<br>0.11%   | 0.33% ±<br>0.09%  | 0.73% ±<br>0.30%  |  | 7.03E-04 | 2.27E-02 |
| d__Bacteria; p__Firmicutes; c__Bacilli;<br>o__Erysipelotrichales; f__Erysipelotrichaceae;<br>g__Lleibacterium; s__Lleibacterium_valens                                                 | 28.57% ±<br>5.19% | 28.77% ±<br>13.01% | 39.26% ±<br>7.85% | 16.60% ±<br>5.86% |  | 6.82E-04 | 2.35E-02 |
| d__Bacteria; p__Firmicutes; c__Clostridia;<br>o__Oscillospirales; f__Oscillospiraceae;<br>g__Colidextribacter                                                                          | 0.06% ±<br>0.03%  | 0.00% ±<br>0.00%   | 0.03% ±<br>0.04%  | 0.05% ±<br>0.03%  |  | 1.64E-03 | 2.66E-02 |
| d__Bacteria; p__Bacteroidota; c__Bacteroidia;<br>o__Bacteroidales; f__Rikenellaceae; g__Alistipes;<br>s__uncultured_bacterium                                                          | 0.04% ±<br>0.02%  | 0.22% ±<br>0.14%   | 0.43% ±<br>0.33%  | 0.32% ±<br>0.16%  |  | 8.68E-04 | 2.68E-02 |
| d__Bacteria; p__Firmicutes; c__Clostridia;<br>o__Clostridia_UCG-014; f__Clostridia_UCG-014;<br>g__Clostridia_UCG-014                                                                   | 0.00% ±<br>0.00%  | 0.03% ±<br>0.02%   | 0.15% ±<br>0.05%  | 0.01% ±<br>0.01%  |  | 1.70E-03 | 2.99E-02 |
| d__Bacteria; p__Bacteroidota; c__Bacteroidia;<br>o__Bacteroidales; f__Muribaculaceae;<br>g__Muribaculaceae; s__uncultured_bacterium                                                    | 1.61% ±<br>0.66%  | 1.11% ±<br>0.10%   | 2.83% ±<br>1.25%  | 3.75% ±<br>0.78%  |  | 1.06E-03 | 3.14E-02 |
| d__Bacteria; p__Firmicutes; c__Bacilli;<br>o__Erysipelotrichales;<br>f__Erysipelatoclostridiaceae;<br>g__Erysipelatoclostridium; s__unidentified                                       | 0.09% ±<br>0.06%  | 0.07% ±<br>0.02%   | 0.00% ±<br>0.01%  | 0.00% ±<br>0.00%  |  | 2.08E-03 | 3.31E-02 |
| d__Bacteria; p__Actinobacteriota;<br>c__Coriobacteriia; o__Coriobacteriales;<br>f__Eggerthellaceae; g__Enterorhabdus;<br>s__uncultured_bacterium                                       | 0.05% ±<br>0.03%  | 0.15% ±<br>0.01%   | 0.04% ±<br>0.03%  | 0.05% ±<br>0.01%  |  | 1.45E-03 | 3.44E-02 |
| d__Bacteria; p__Firmicutes; c__Clostridia;<br>o__Lachnospirales; f__Lachnospiraceae                                                                                                    | 0.00% ±<br>0.00%  | 0.00% ±<br>0.00%   | 0.00% ±<br>0.00%  | 0.03% ±<br>0.01%  |  | 2.58E-03 | 3.78E-02 |
| d__Bacteria; p__Firmicutes; c__Clostridia;<br>o__Lachnospirales; f__Lachnospiraceae                                                                                                    | 0.10% ±<br>0.08%  | 0.00% ±<br>0.00%   | 0.03% ±<br>0.03%  | 0.00% ±<br>0.00%  |  | 3.20E-03 | 3.80E-02 |
| d__Bacteria; p__Firmicutes; c__Clostridia;<br>o__Oscillospirales; f__UCG-010; g__UCG-010;<br>s__unidentified                                                                           | 0.04% ±<br>0.02%  | 0.09% ±<br>0.03%   | 0.01% ±<br>0.01%  | 0.00% ±<br>0.00%  |  | 3.93E-03 | 3.84E-02 |
| d__Bacteria; p__Firmicutes; c__Bacilli;<br>o__Erysipelotrichales; f__Erysipelotrichaceae;<br>g__Faecalibaculum; s__uncultured_bacterium                                                | 0.14% ±<br>0.04%  | 0.62% ±<br>0.36%   | 0.30% ±<br>0.15%  | 0.14% ±<br>0.01%  |  | 1.60E-03 | 3.91E-02 |
| d__Bacteria; p__Firmicutes; c__Bacilli;<br>o__Lactobacillales; f__Streptococcaceae;<br>g__Streptococcus; s__Streptococcus_danieliae                                                    | 0.00% ±<br>0.00%  | 0.00% ±<br>0.00%   | 0.03% ±<br>0.01%  | 0.00% ±<br>0.00%  |  | 2.39E-03 | 4.16E-02 |
| d__Bacteria; p__Firmicutes; c__Clostridia;<br>o__Oscillospirales;<br>f__[Eubacterium]_coprostanoligenes_group;<br>g__[Eubacterium]_coprostanoligenes_group;<br>s__uncultured_bacterium | 0.00% ±<br>0.00%  | 0.00% ±<br>0.00%   | 0.06% ±<br>0.05%  | 0.01% ±<br>0.01%  |  | 3.15E-03 | 4.34E-02 |
| d__Bacteria; p__Firmicutes; c__Clostridia;                                                                                                                                             | 0.04% ±           | 0.33% ±            | 0.05% ±           | 0.00% ±           |  | 2.80E-03 | 4.66E-02 |

|                                                                                                                                                  |                  |                  |                  |                  |  |          |          |
|--------------------------------------------------------------------------------------------------------------------------------------------------|------------------|------------------|------------------|------------------|--|----------|----------|
| o__Oscillospirales; f__Ruminococcaceae;<br>g__Incertae_Sedis; s__uncultured_bacterium                                                            | 0.05%            | 0.12%            | 0.06%            | 0.00%            |  |          |          |
| d__Bacteria; p__Firmicutes; c__Clostridia;<br>o__Peptococcales; f__Peptococcaceae;<br>g__uncultured; s__unidentified                             | 0.04% ±<br>0.05% | 0.00% ±<br>0.00% | 0.03% ±<br>0.02% | 0.07% ±<br>0.03% |  | 5.07E-03 | 4.76E-02 |
| d__Bacteria; p__Actinobacteriota;<br>c__Coriobacteriia; o__Coriobacteriales;<br>f__Eggerthellaceae; g__Gordonibacter;<br>s__uncultured_bacterium | 0.13% ±<br>0.08% | 0.19% ±<br>0.04% | 0.08% ±<br>0.05% | 0.05% ±<br>0.01% |  | 2.54E-03 | 4.91E-02 |
